# Supplementary material for: Structure elucidation of a novel family of mycolactone toxins from the frog pathogen Mycobacterium sp. MU128FXT by mass spectrometry
Source: Royal Society of Chemistry journal article supplement (doi:10.1039/b506835e), 2005-01-01

## Experimental procedures

† On-line ESI-LC-MS and ESI-LC-MS/MS analysis were carried out on an LCQ ion trap mass spectrometer (Thermo Finnigan, USA) as described previously<sup>9</sup>. High-resolution MS and MS/MS were performed on a BioApex II (4.7 Tesla) FTICR mass spectrometer (Bruker Daltonics, US) using CO<sub>2</sub> as collision gas.

‡ *M. ulcerans* strain MUAgy99 (isolated from a patient in Ghana in 1999) was cultured in Dubos broth at 30°C for eight weeks. Cells were harvested by centrifugation and acetone soluble lipids (including mycolactones) were extracted by the method of Rohr as previously described<sup>3</sup>. Mycolactones were prepared from MU128FXT as for MUAgy99 except that cells were harvested from cultures grown on solid egg-yolk agar medium for three weeks at 30°C.

§ Deuterium exchange experiments were performed essentially as previously described<sup>9</sup>. After exchange, the samples were analysed either by the LCQ or by the FTICR mass spectrometer. When FTICR-MS/MS experiments were performed, the fully deuterated parent ion was isotopically isolated for fragmentation.

**Table 1** Comparison of molecular formula, numbers of exchangeable protons, and of degree of unsaturation, in mycolactones from the African strain MUAgy99 and the frog pathogen MU128FXT strain.

| MUAgy99 <sup>a</sup> (African strain) |                                                   |                  |                | MU128FXT                          |                                                   |                  |                |                  |                |
|---------------------------------------|---------------------------------------------------|------------------|----------------|-----------------------------------|---------------------------------------------------|------------------|----------------|------------------|----------------|
| Metabolite<br>[M+Na] <sup>+</sup>     | Formula                                           | DBE <sup>b</sup> | n <sup>c</sup> | Metabolite<br>[M+Na] <sup>+</sup> | Formula                                           | Observed<br>mass | Error<br>(ppm) | DBE <sup>b</sup> | n <sup>c</sup> |
| 765                                   | C <sub>44</sub> H <sub>70</sub> O <sub>9</sub> Na | 10               | 5              | 737                               | C <sub>43</sub> H <sub>70</sub> O <sub>8</sub> Na | 737.4980         | -2.3           | 9                | 4              |
| 763                                   | C <sub>44</sub> H <sub>68</sub> O <sub>9</sub> Na | 11               | 4              | 735                               | C <sub>43</sub> H <sub>68</sub> O <sub>8</sub> Na | 735.4821         | -1.9           | 10               | 3              |

<sup>a</sup> The data for mycolactones from MUAgy99 are taken from reference [9]. <sup>b</sup> Double bond equivalent. <sup>c</sup> Number of deuterons after exchange.

**Table 2** The formula, fragment ion identity, and observed mass for main ions observed in the high-resolution (FTICR) MS/MS experiment on mycolactone-737 from MU128FXT strain.

| Formula                                           | Fragment identity                                        | Observed mass | Error<br>(ppm) | Number of deuteriums |
|---------------------------------------------------|----------------------------------------------------------|---------------|----------------|----------------------|
| C <sub>43</sub> H <sub>70</sub> O <sub>8</sub> Na | Precursor ion                                            | 737.4942      | 2.8            | 4                    |
| C <sub>40</sub> H <sub>64</sub> O <sub>7</sub> Na | Loss of propionaldehyde from the side chain              | 679.4426      | 3.0            | 4                    |
| C <sub>39</sub> H <sub>62</sub> O <sub>6</sub> Na | Loss of β-OH- <i>n</i> -butyraldehyde from the core      | 649.4426      | 2.0            | 3                    |
| C <sub>38</sub> H <sub>60</sub> O <sub>6</sub> Na | Loss of β-OH- <i>n</i> -pentaldehyde from the side chain | 635.4278      | 0.6            | 3                    |
| C <sub>34</sub> H <sub>58</sub> O <sub>8</sub> Na | Loss of 1,3,5-tri-methyl benzene from the side chain     | 617.3991      | 5.3            | 4                    |
| C <sub>36</sub> H <sub>54</sub> O <sub>6</sub> Na | Ion E <sup>a</sup>                                       | 605.3863      | -8.2           | 2 <sup>b</sup>       |
| C <sub>34</sub> H <sub>52</sub> O <sub>6</sub> Na | Ion D <sup>a</sup>                                       | 579.3657      | -0.1           | 2                    |
| C <sub>33</sub> H <sub>50</sub> O <sub>6</sub> Na | Ion C <sup>a</sup>                                       | 565.3506      | -1.2           | 2 <sup>b</sup>       |
| C <sub>25</sub> H <sub>42</sub> O <sub>4</sub> Na | Ion A                                                    | 429.2989      | -3.2           | 2                    |
| C <sub>18</sub> H <sub>28</sub> O <sub>4</sub> Na | Ion B                                                    | 331.1893      | -4.0           | 2                    |

<sup>a</sup> See Fig. 4. <sup>b</sup> From deuterated MS/MS spectrum from the LCQ.

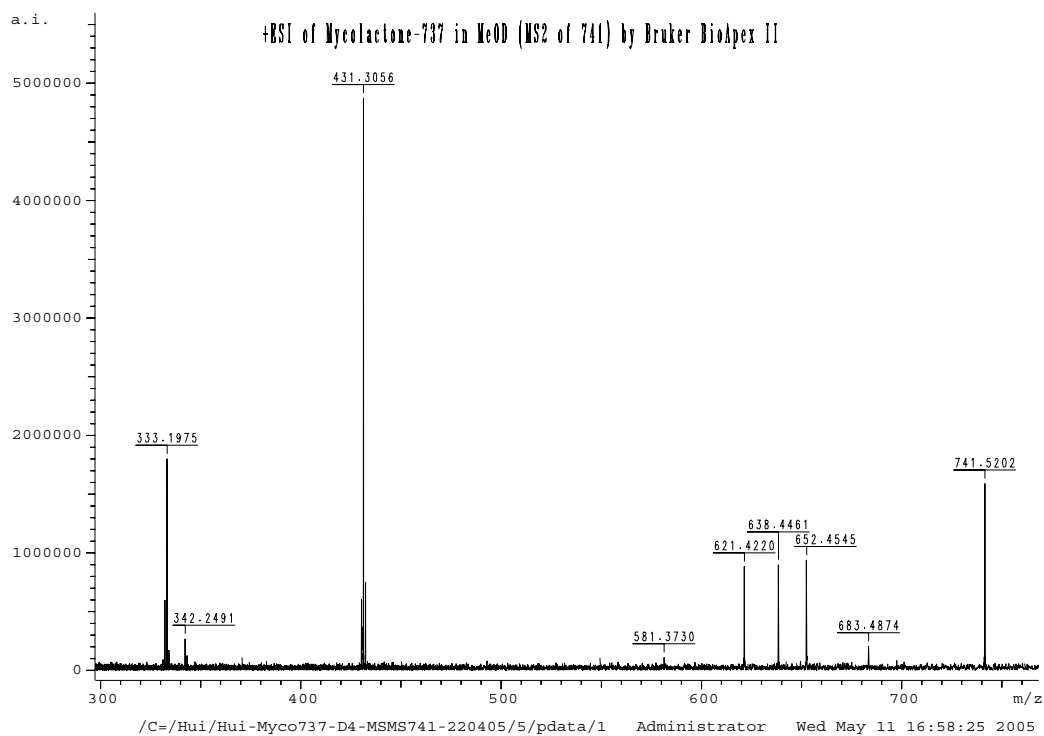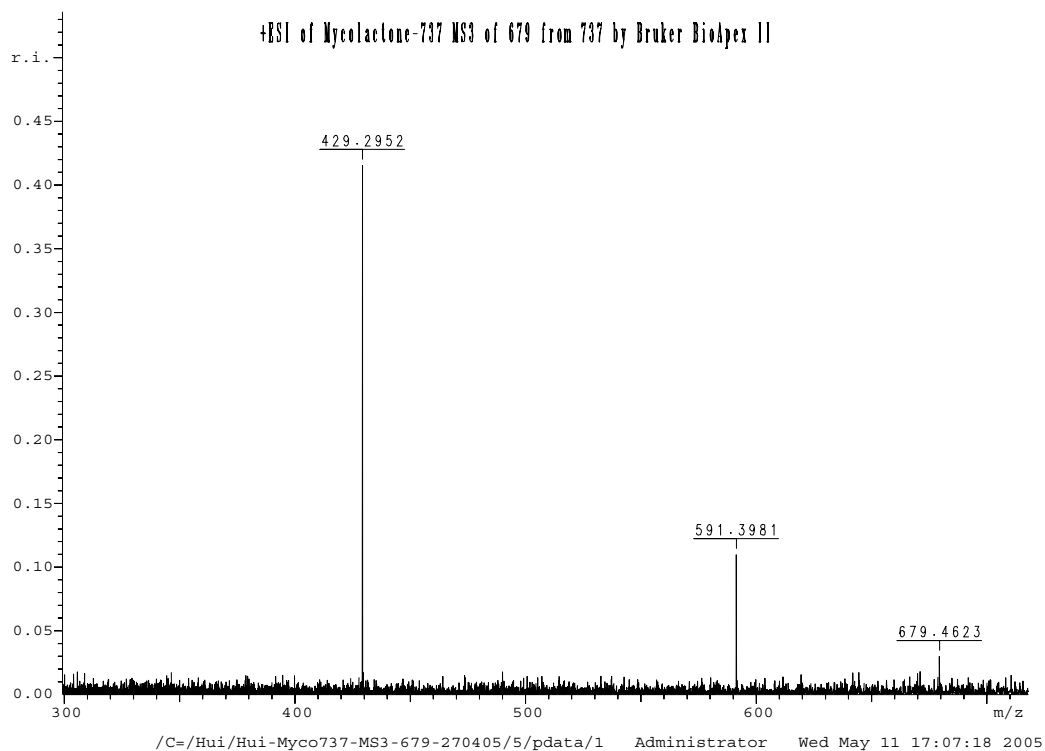

## MS/MS spectrum of mycolactone-735 by Finnigan LCQ

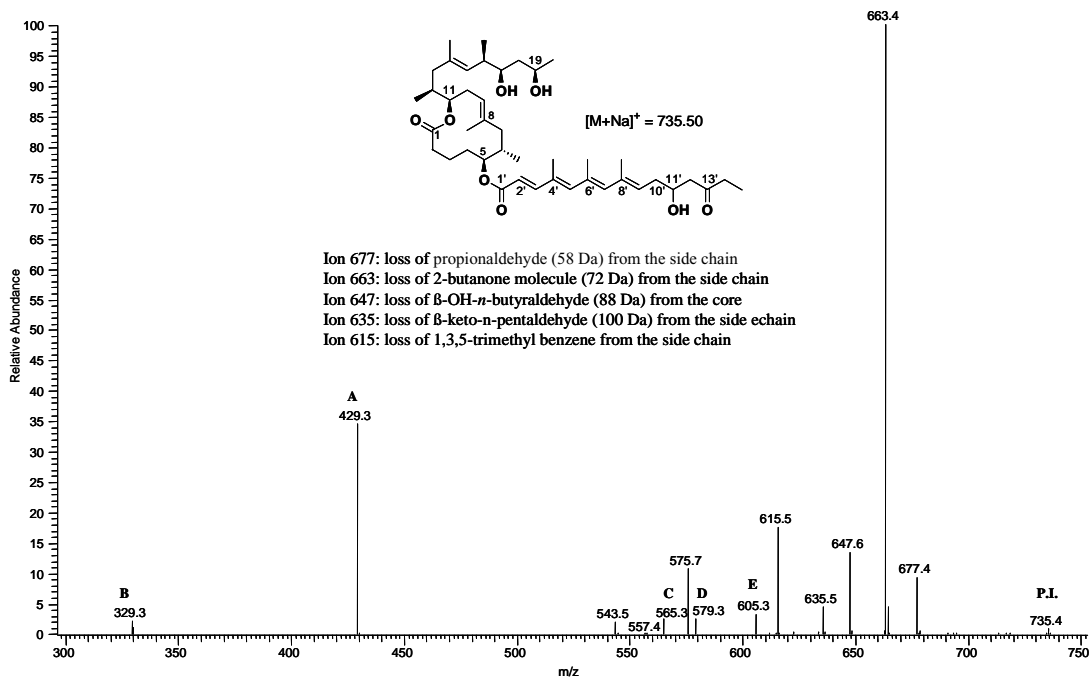MS<sup>3</sup> spectrum of 663 from MS/MS of 735 by Finnigan LCQ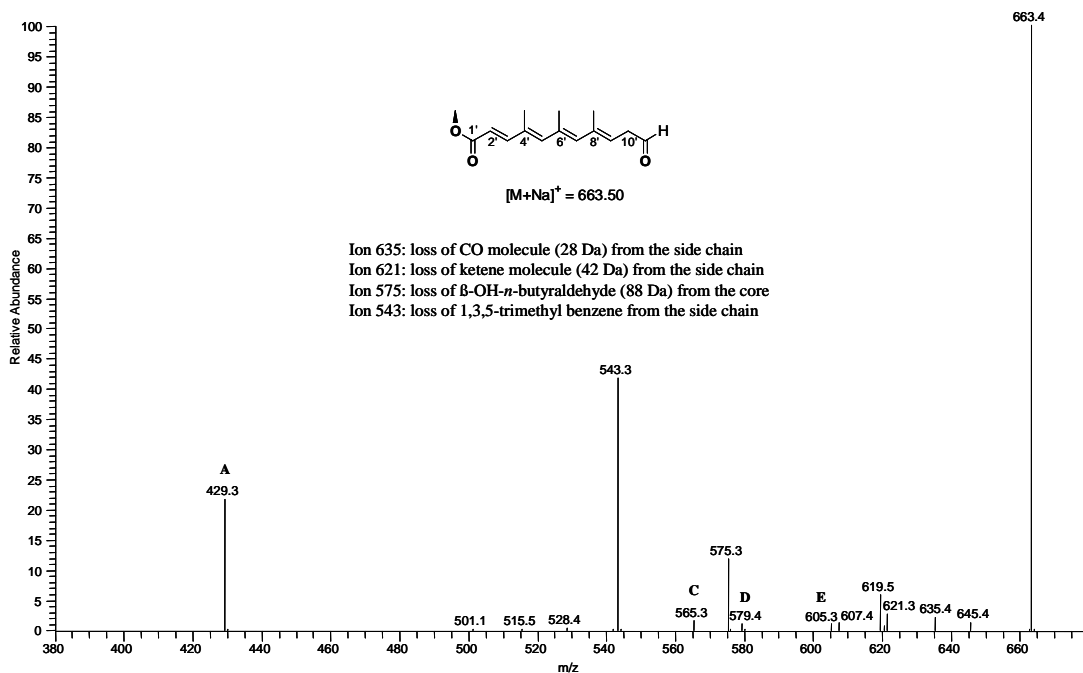

Supplement: b506835e.pdf [file b506835e.pdf]
